# Supplementary material for: Cold-induced aldimine bond cleavage by Tris inBacillus subtilisalanine racemase
Source: Royal Society of Chemistry journal article supplement (doi:10.1039/c9ob00223e), 2019-01-01

## Electronic Supporting Information

### Cold-induced aldimine bond cleavage by Tris in *Bacillus subtilis* alanine racemase

Noelia Bernardo-García<sup>a</sup>, Pedro A. Sánchez-Murcia<sup>b</sup>, Akbar Espaillat<sup>c</sup>, Siseth Martínez-Caballero<sup>a</sup>,  
Felipe Cava<sup>c</sup>, Juan A. Hermoso<sup>\*a</sup>, and Federico Gago<sup>\*b</sup>

<sup>a</sup> Department of Crystallography and Structural Biology, Institute of Physical Chemistry "Rocasolano", CSIC, 28006 Madrid, Spain

<sup>b</sup> Department of Biomedical Sciences, "Unidad Asociada IQM-CSIC", University of Alcalá, E-28871 Alcalá de Henares, Madrid, Spain

<sup>c</sup> Laboratory for Molecular Infection Medicine, Department of Molecular Biology, Umeå Centre for Microbial Research, Umeå University, 90187 Umeå, Sweden

\*Corresponding authors. Email: xjuan@iqfr.csic.es / Email: federico.gago@uah.es

#### Supplementary information

Following the first round of reviews, fresh protein was produced and new crystals of *Bs*-AlaR were grown by the microbatch method in a medium containing 15% PEG 4000, 0.2 M MgCl<sub>2</sub>, 0.1 M Tris (TRS) pH = 8.5.

Three X-ray diffraction data sets from these new *Bs*AlaR crystals were collected on beamline bl13-Xaloc at ALBA (Barcelona, Spain), with oscillation ranges of 0.15° for two of them and 0.20° for the other one. These crystals diffracted at 2.3, 2.5 and 2.7 Å resolution, respectively, and in all of them we observed the same active site arrangement and aldimine bond cleavage that we originally described in the main text for *Bs*AlaR–TRS (**Figure S1**).

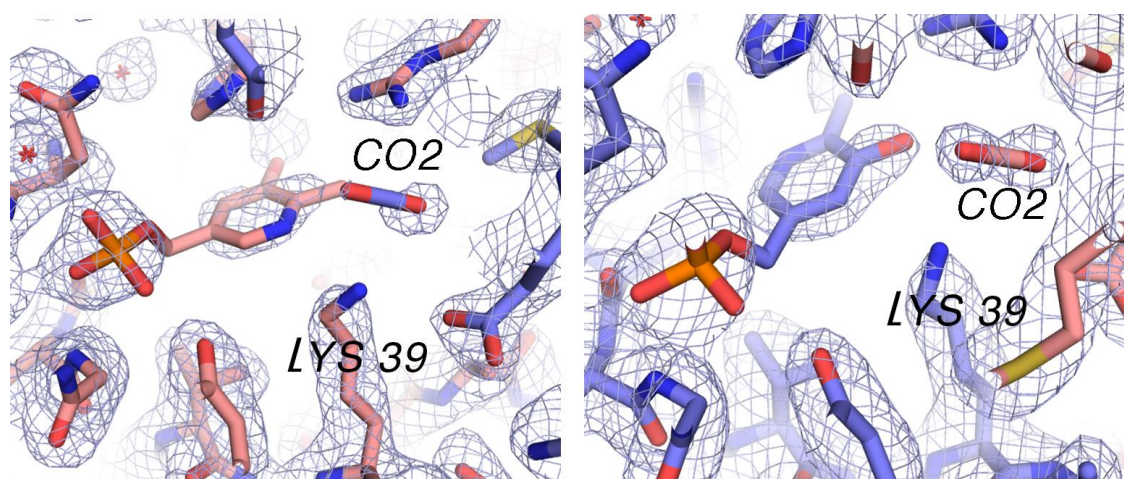

**Figure S1.** Electron density map ( $2F_o - F_c$  map contoured at  $1\sigma$ ) of both active sites from the crystal at 2.3 Å resolution. The other datasets at 2.5 and 2.7 Å present the same active site conformation observed in the dataset at 2.2 Å (reported in the main text) and 2.3 Å albeit with less quality details because of the slightly worse resolution.

**Table S1. Crystallographic data collection and refinement statistics for crystal #1.**

|                                              | <i>BsAlaR</i><br>Xtal 1 |
|----------------------------------------------|-------------------------|
| <b>Data collection</b>                       |                         |
| Wavelength (Å)                               | 0.980110                |
| Space group                                  | P4 <sub>3</sub> 22      |
| Unit cell <i>a</i> , <i>b</i> , <i>c</i> (Å) | 73.10, 73.10, 333.0     |
| Unit cell $\alpha, \beta, \gamma$ (°)        | 90, 90, 90              |
| T (K)                                        | 100                     |
| X-ray source                                 | Synchrotron             |
| Resolution range (Å)                         | 46.9-(2-30-2.22)        |
| Unique reflections                           | 41560                   |
| Completeness (%)                             | 99.9 (100.0)            |
| Redundancy                                   | 7.8                     |
| R <sub>merge</sub>                           | 0.2 (1.83)              |
| R <sub>pim</sub>                             | 0.115 (1.029)           |
| Average $I/\sigma(I)$                        | 8.5 (1.7)               |
| <b>Refinement</b>                            |                         |
| Resolution range (Å)                         | 46.9-2.3                |
| R <sub>work</sub> /R <sub>free</sub>         | 0.19/0.24               |
| Monomers per AU                              | 2                       |

**Figure S2.** Proposed mechanism for the Tris-assisted 4'-deformylation of PLP in *BsAlaR*.

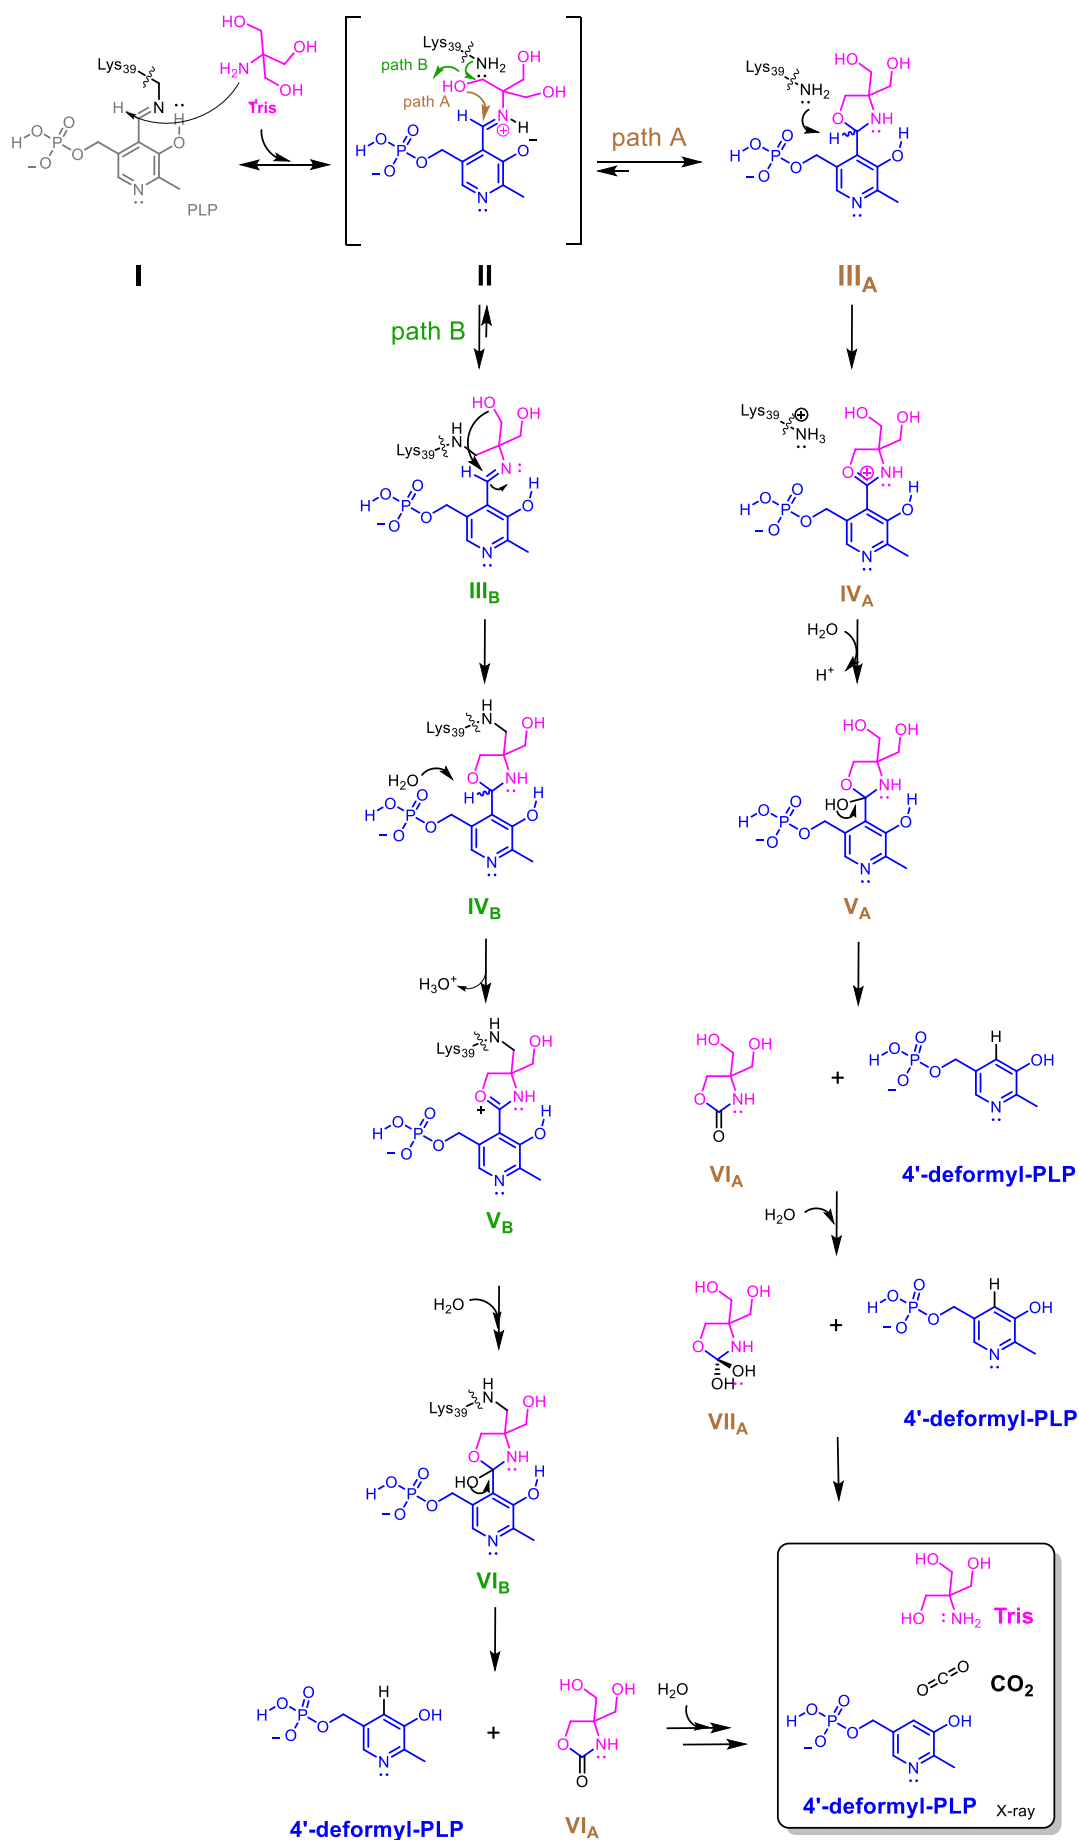

Supplement: c9ob00223e1.pdf [file c9ob00223e1.pdf]
